# Supplementary material
Source: Royal Society of Chemistry journal article supplement (doi:10.1039/d6su00101g)
Supplement: d6su00101g1.pdf [file d6su00101g1.pdf]

**Mechanochemically engineered ammonium magnesium-sulfate double salts synthesized from ammonium carbonate for improved nitrogen-use efficiency**

Mohamed Ammar,<sup>1,‡</sup> Julia Farias,<sup>2,3‡</sup> Emmanuel Aransiola,<sup>1</sup> Matthew Conley,<sup>4</sup> Kerry A. Hamilton,<sup>2,3</sup> Clinton Williams,<sup>4</sup> and Jonas Baltrusaitis<sup>1,\*</sup>

<sup>1</sup>Department of Chemical and Biomolecular Engineering, Lehigh University, 124 E. Morton St., Bethlehem, PA 18015, United States of America

<sup>2</sup>The Biodesign Institute Center for Environmental Health Engineering, Arizona State University, Tempe, AZ 85281, United States of America

<sup>3</sup>School of Sustainable Engineering and the Built Environment, Arizona State University, Tempe, AZ 85281, United States of America

<sup>4</sup>Agricultural Research Service, U.S. Department of Agriculture, Maricopa, AZ 85138, United States of America

Tables S1-S3. Fresh plant weight (g plant<sup>-1</sup>), ACI, chlorophyll (mg g<sup>-1</sup> FW), Nitrate (mg Kg<sup>-1</sup> soil) and Total Nitrogen (mg Kg<sup>-1</sup> soil).

Table S1. Fresh weight (g plant<sup>-1</sup>)

| Soil | NN     | AC     | UR     | MgS    |
|------|--------|--------|--------|--------|
| A    | 0.0476 | 0.0798 | 0.0852 | 0.0904 |
| A    | 0.1019 | 0.0878 | 0.0739 | 0.0712 |
| A    | 0.067  | 0.027  | 0.0938 | 0.1065 |
| A    | 0.048  | 0.1036 | 0.0804 | 0.0835 |
| A    | 0.0892 | 0.1299 | 0.1078 | 0.1124 |
| A    | 0.0911 | 0.081  | 0.0792 | 0.112  |
| A    | 0.0532 | 0.1128 | 0.0817 | 0.0973 |
| A    | 0.0698 | 0.0984 | 0.075  | 0.0982 |
| B    | 0.1442 | 0.158  | 0.1196 | 0.1245 |
| B    | 0.1079 | 0.0494 | 0.116  | 0.2    |
| B    | 0.1095 | 0.1298 | 0.0964 | 0.1223 |
| B    | 0.1095 | 0.1551 | 0.1422 | 0.138  |
| B    | 0.1147 | 0.0864 | 0.1404 | 0.1612 |
| B    | 0.0998 | 0.157  | 0.168  | 0.178  |
| B    | 0.0828 | 0.1243 | 0.1067 | 0.0547 |
| B    | 0.097  | 0.1406 | 0.1139 | 0.1165 |
| C    | 0.1151 | 0.2439 | 0.2394 | 0.3    |
| C    | 0.0867 | 0.2332 | 0.4045 | 0.345  |
| C    | 0.0961 | 0.147  | 0.3322 | 0.2874 |
| C    | 0.1774 | 0.1028 | 0.1579 | 0.4478 |
| C    | 0.1255 | 0.0694 | 0.2903 | 0.1798 |
| C    | 0.086  | 0.2139 | 0.1097 | 0.3566 |
| C    | 0.1074 | 0.1631 | 0.2168 | 0.3087 |
| C    | 0.1074 | 0.1721 | 0.3304 | 0.2438 |

Table S2. ACI

| Soil | NN    | AC    | UR    | MgS   |
|------|-------|-------|-------|-------|
| A    | 40.38 | 42.33 | 27.45 | 36.68 |
| A    | 41.64 | 39.66 | 39.31 | 38.02 |
| A    | 30.62 | 38.80 | 38.64 | 39.02 |
| A    | 39.01 | 44.86 | 36.91 | 40.67 |
| A    | 39.21 | 40.56 | 41.22 | 36.28 |
| A    | 41.24 | 38.57 | 34.41 | 40.56 |
| A    | 33.51 | 41.03 | 28.55 | 38.06 |
| A    | 32.92 | 37.78 | 38.71 | 39.67 |
| B    | 48.57 | 47.04 | 51.82 | 47.71 |
| B    | 53.07 | 39.08 | 42.44 | 44.64 |
| B    | 44.23 | 38.14 | 48.35 | 44.11 |
| B    | 45.24 | 43.25 | 51.28 | 47.31 |
| B    | 43.47 | 49.40 | 48.21 | 47.77 |
| B    | 53.13 | 41.81 | 55.21 | 50.84 |
| B    | 51.99 | 48.79 | 41.52 | 46.15 |
| B    | 50.84 | 45.86 | 51.87 | 47.40 |
| C    | 50.25 | 32.70 | 39.45 | 34.71 |
| C    | 47.90 | 43.14 | 33.16 | 42.40 |
| C    | 52.51 | 43.61 | 30.15 | 33.62 |
| C    | 39.92 | 37.86 | 35.89 | 33.29 |
| C    | 45.81 | 43.90 | 34.35 | 34.25 |
| C    | 52.98 | 45.78 | 39.19 | 40.62 |
| C    | 44.15 | 34.33 | 31.41 | 31.71 |
| C    | 46.62 | 35.67 | 34.87 | 37.43 |

Table S3.

| Chlorophyll (mg g <sup>-1</sup> FW)       |           |           |           |           |
|-------------------------------------------|-----------|-----------|-----------|-----------|
| Soil                                      | NN        | AC        | UR        | MgS       |
| A                                         | 6.466765  | 4.188871  | 6.315276  | 8.544354  |
| A                                         | 7.303531  | 4.870701  | 5.736916  | 6.564397  |
| A                                         | 6.885148  | 4.529786  | 6.026096  | 7.5543755 |
| B                                         | 4.018812  | 4.559235  | 4.374053  | 3.824345  |
| B                                         | 1.790531  | 5.736916  | 4.335319  | 4.330278  |
| B                                         | 2.9046715 | 5.1480755 | 4.354686  | 4.0773115 |
| C                                         | 3.946385  | 3.848753  | 8.428152  | 8.978657  |
| C                                         | 3.90261   | 5.980996  | 8.111645  | 9.315328  |
| C                                         | 3.9244975 | 4.9148745 | 8.2698985 | 9.1469925 |
| Nitrate (mg Kg <sup>-1</sup> soil)        |           |           |           |           |
| Soil                                      | NN        | AC        | UR        | MgS       |
| A                                         | 14.0      | 15.0      | 73        | 39.0      |
| A                                         | 14.0      | 15.0      | 71.0      | 38.0      |
| A                                         | 17.0      | 14.0      | 65.0      | 58.0      |
| B                                         | 4.9       | 19.0      | 25        | 33.0      |
| B                                         | 1.7       | 21.0      | 25.0      | 17.0      |
| B                                         | 1.4       | 21.0      | 21.0      | 31.0      |
| C                                         | 1.1       | 2.7       | 7.0       | 6.3       |
| C                                         | 1.1       | 2.7       | 21.0      | 4.9       |
| C                                         | 0.8       | 2.0       | 12.2      | 6.3       |
| Total Nitrogen (mg Kg <sup>-1</sup> soil) |           |           |           |           |
| soil                                      | NN        | AC        | UR        | MgS       |
| A                                         | 180       | 260       | 210       | 420       |
| A                                         | 250       | 260       | 250       | 490       |
| A                                         | 240       | 248       | 360       | 300       |
| B                                         | 310       | 590       | 580       | 650       |
| B                                         | 360       | 400       | 500       | 420       |
| B                                         | 310       | 490       | 600       | 526       |
| C                                         | 250       | 230       | 410       | 628       |
| C                                         | 100       | 180       | 560       | 730       |
| C                                         | 110       | 160       | 460       | 620       |
